# Supplementary material for: Nanogel antigenic protein-delivery system for adjuvant-free intranasal vaccines
Source: Springer Nature journal article supplement (doi:10.1038/nmat2784), 2010-06-20
Supplement: 41563_2010_BFnmat2784_MOESM13_ESM.pdf [file 41563_2010_BFnmat2784_MOESM13_ESM.pdf]

## Supplementary Figure 1

T. Nochi, et al.

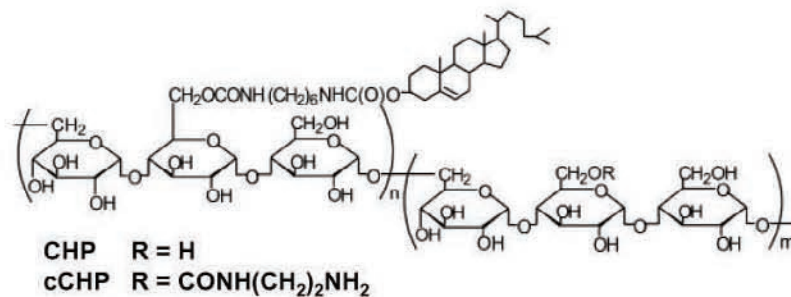

**Supplementary Fig. 1. Chemical structure of cationic type of cholesteryl group-bearing pullulan (cCHP).** cCHP nanogel contains 15 amino groups per 100 glucose units.

Supplementary Figure 2

T. Nochi, et al.

**a**

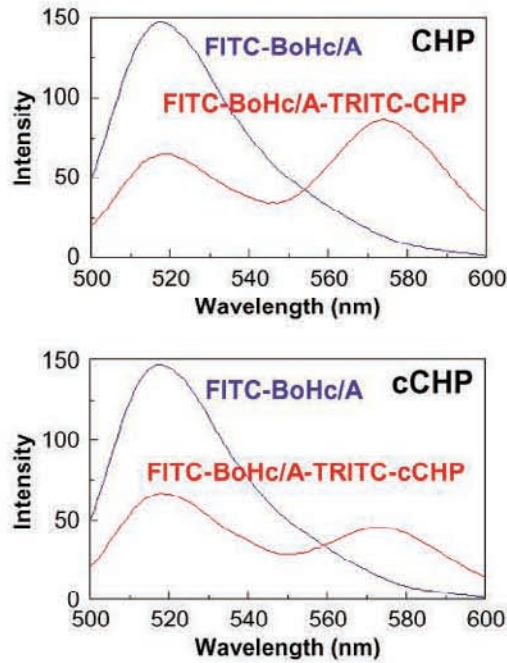

**b**

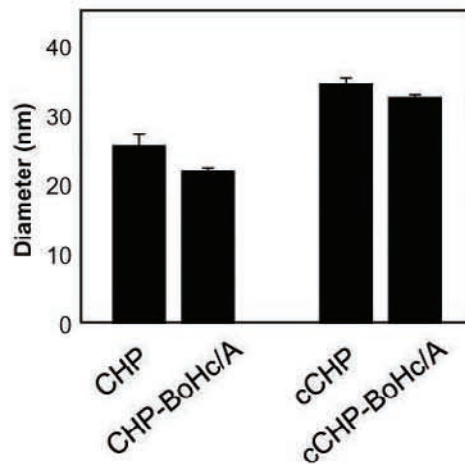

**Supplementary Fig. 2. CHP and cCHP nanogels form nanosize particles carrying vaccine antigen.** Fluorescence response energy transfer was detected from TRITC-conjugated CHP or TRITC-conjugated cCHP carrying FITC-conjugated BoHc/A, but not from FITC-conjugated naked BoHc/A (a). Dynamic light scattering analysis showed that CHP or cCHP nanogel was still of uniform size after the incorporation of BoHc/A (b).

## Supplementary Figure 3

T. Nochi, et al.

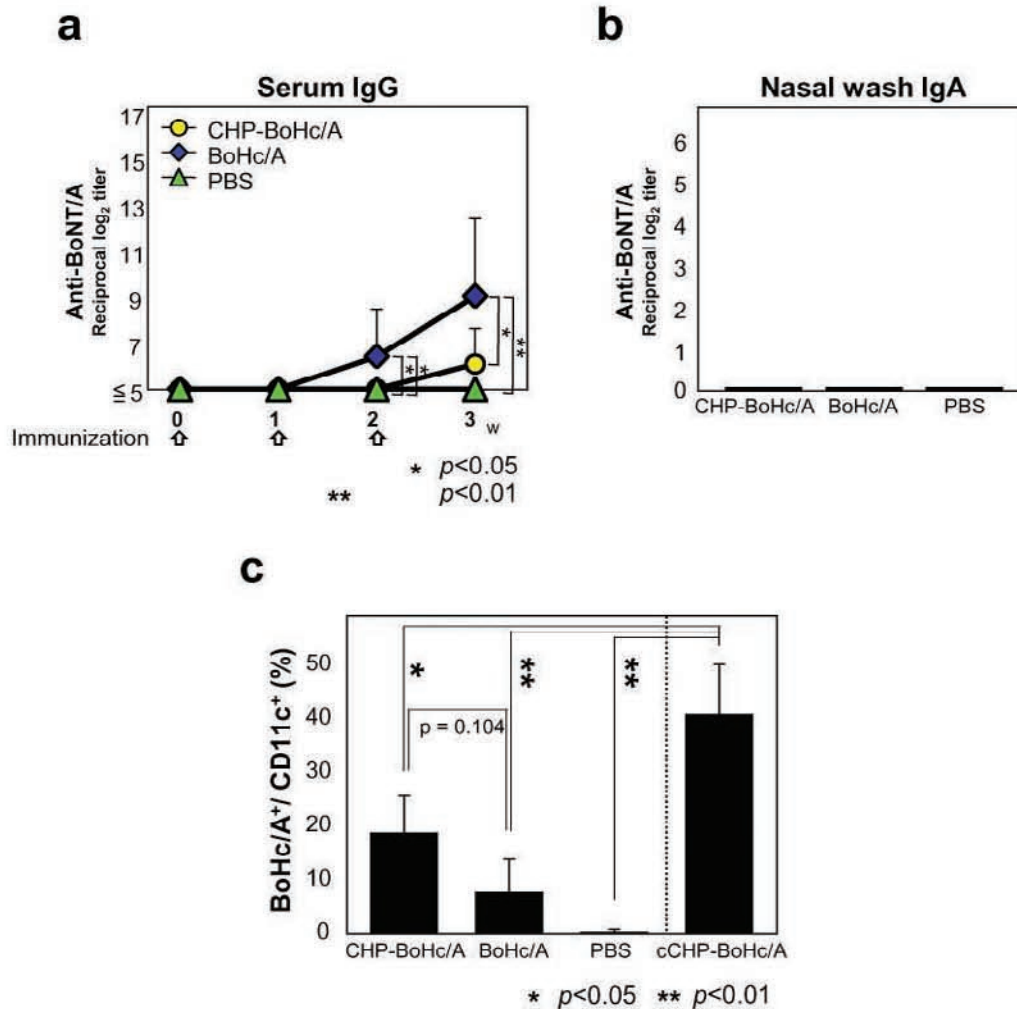

**Supplementary Fig. 3. CHP nanogel does not act as a delivery vehicle for intranasal vaccine.** Levels of BoNT-specific serum IgG (**a**) and nasal IgA (**b**) antibody were no greater in mice intranasally administered with CHP-BoHc/A than in mice administered with naked BoHc/A or control PBS. (**c**) BoHc/A administered with CHP nanogel was not effectively delivered to DCs in nasal tissue when compared with naked BoHc/A. cCHP-BoHc/A was used as a positive control.

Supplementary Figure 4

T. Nochi, et al.

**a**

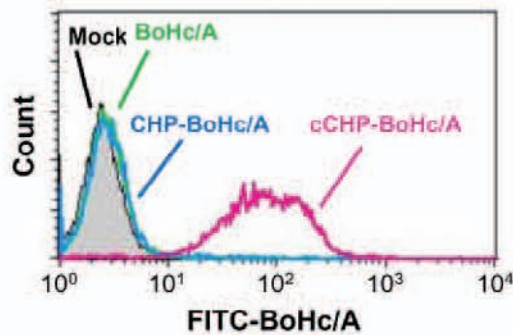

**b**

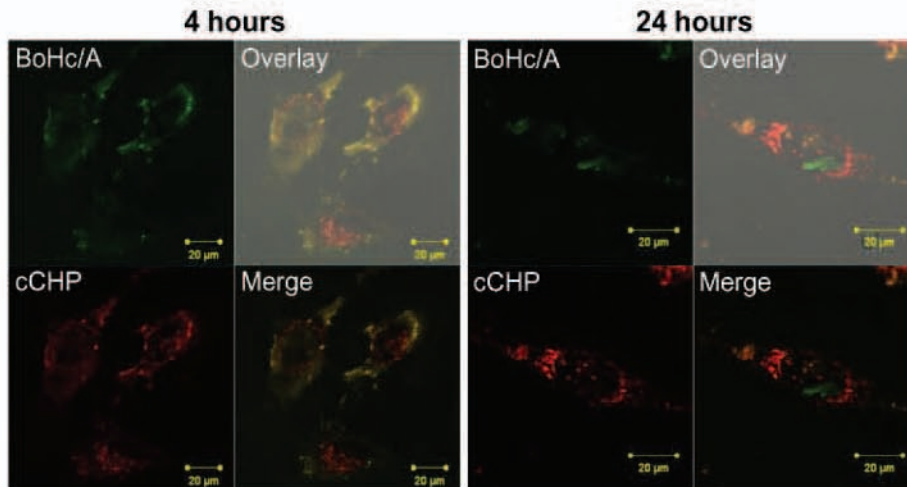

**Supplementary Fig. 4. cCHP but not CHP nanogel delivers vaccine antigen into cells *in vitro*.** Unlike CHP-BoHc/A, cCHP-BoHc/A interacted strongly with HeLa cells (a) and was immediately taken up into the cells by endocytosis (b). BoHc/A was released from the cCHP nanogel in a controlled manner (b).

## Supplementary Figure 5

T. Nochi, et al.

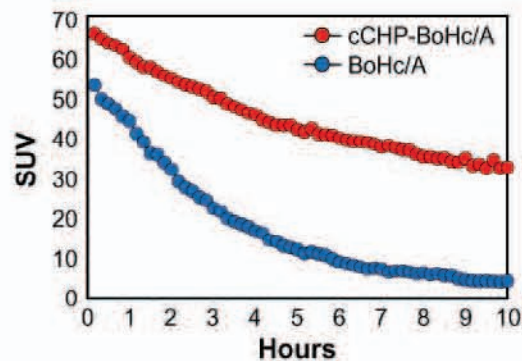

**Supplementary Fig. 5. Antigen intranasally administered with cCHP nanogel is effectively delivered to nasal mucosa.** Quantitative analysis of positron emission tomography imaging experiments showed that approximately 50% of the BoHc/A was retained in the nasal cavity 10 h after intranasal administration with cCHP nanogel. SUV, standardized uptake value.

Supplementary Figure 6

T. Nochi, et al.

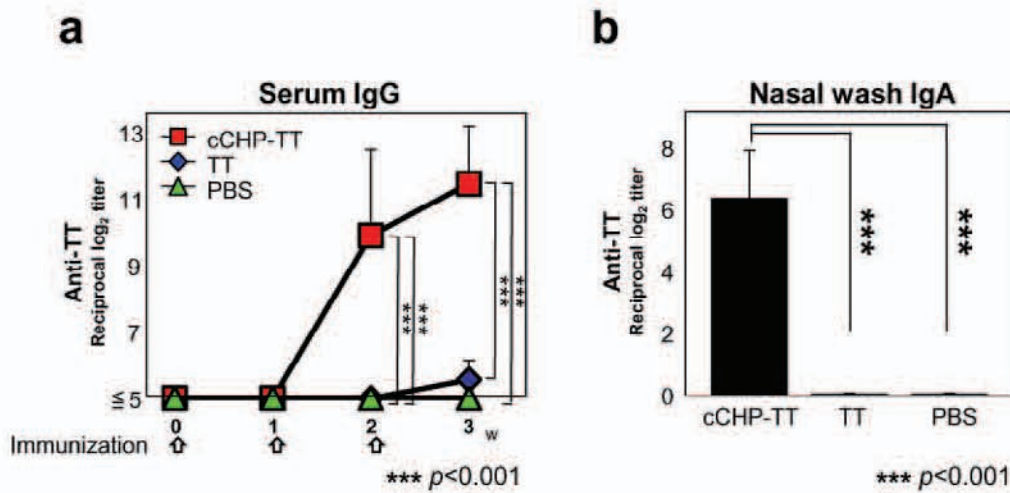

**Supplementary Fig. 6. cCHP nanogel acts as a universal delivery vehicle for intranasal vaccines.** As in the immunization study with cCHP-BoHc/A, mice intranasally immunized with cCHP-TT showed high levels of TT-specific serum IgG (a) and nasal IgA (b) antibody responses, unlike mice administered intranasally with naked TT or control PBS.

## Supplementary Figure 7

T. Nochi, et al.

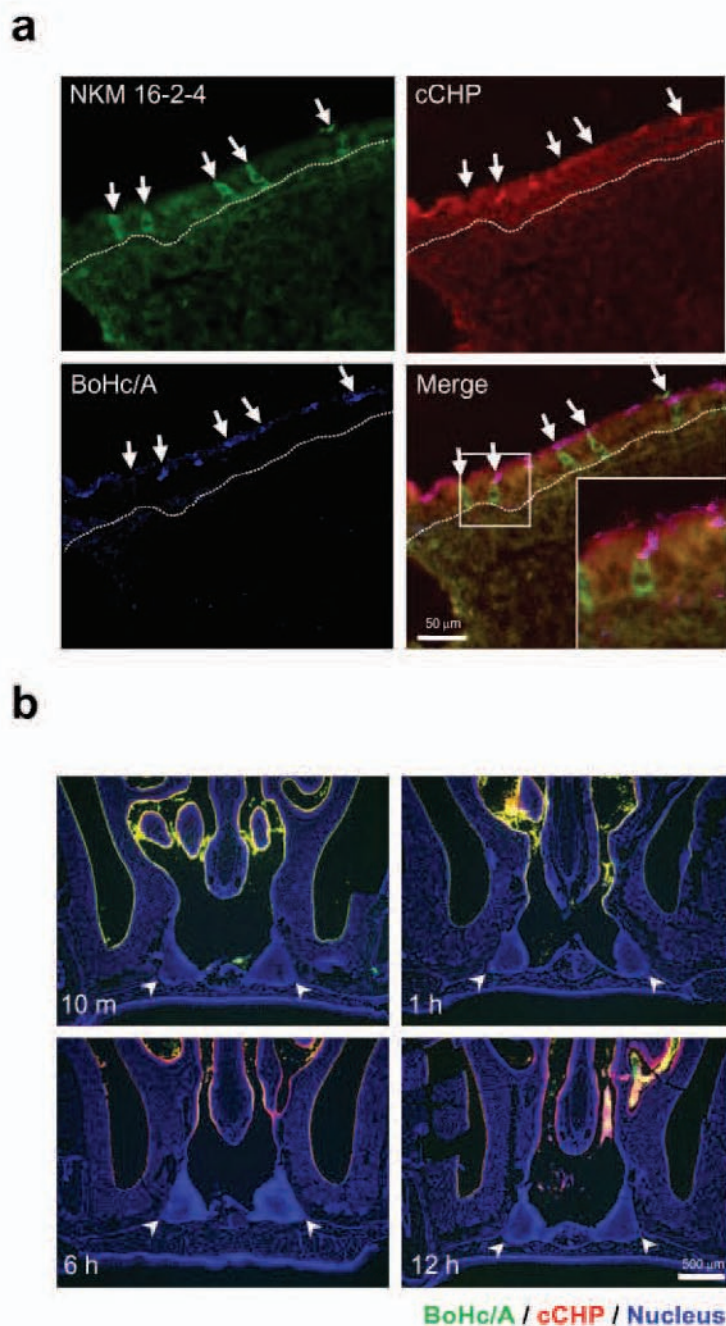

**Supplementary Fig. 7. Uptake of cCHP-BoHc/A by M cells in nasopharynx-associated lymphoid tissues (NALT).** Although some of the BoHc/A administered intranasally with cCHP nanogel was taken up by NKM 16-2-4<sup>+</sup> M cells (arrows) in the follicle-associated epithelium of NALT within 1 h of administration (a), the fluorescence signals were lower in NALT (b) than that detected in nasal epithelium (see Figure 3A). Basal layer of epithelium in A and NALT in B are shown by dotted line and arrowheads, respectively.

## Supplementary Figure 8

T. Nochi, et al.

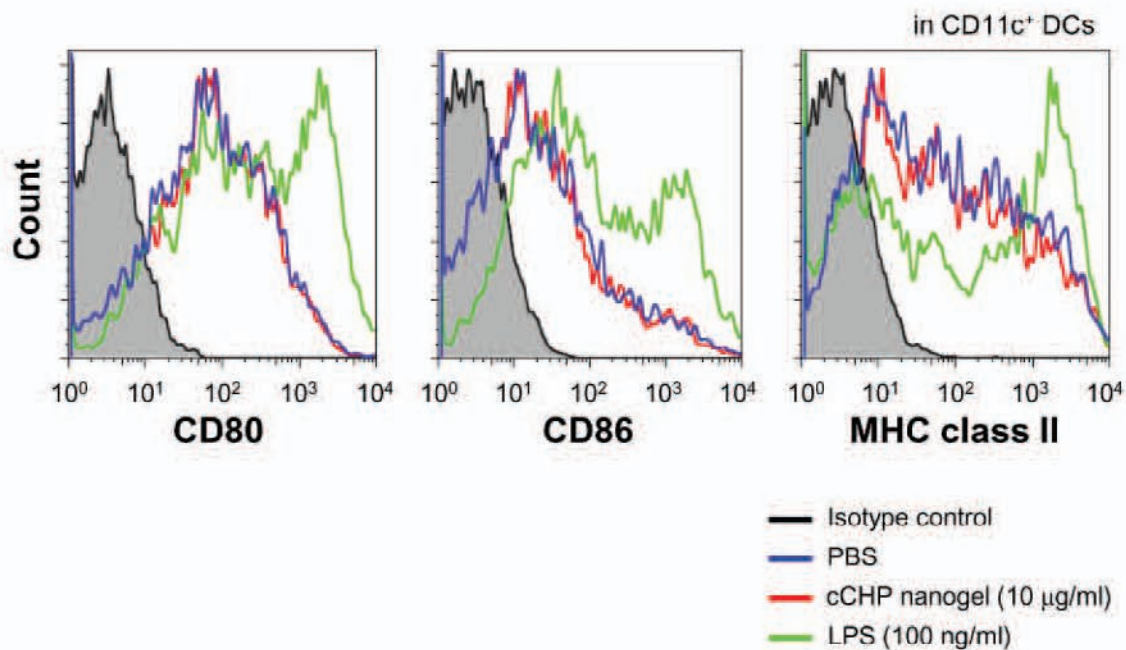

**Supplementary Fig. 8. Expression levels of co-stimulatory and antigen-presentation molecules in bone marrow-derived DCs (BM-DCs) are not changed after stimulation with cCHP nanogel.** BM cells were cultured in the presence of 10 ng/ml of GM-CSF for 5 days *in vitro* for generating the BM-DCs. BM-DCs were then cultivated with 10 µg/ml of cCHP nanogel or 100 ng/ml of LPS. After 1 day of stimulation, the cells were harvested and used for flow cytometry analysis. The expression levels of CD80, CD86 and MHC class II on CD11c<sup>+</sup> BM-DCs were not changed when cultivated with cCHP nanogel. In contrast, the levels were enhanced by stimulation with LPS.



## Supplementary Figure 9

T. Nochi, et al.

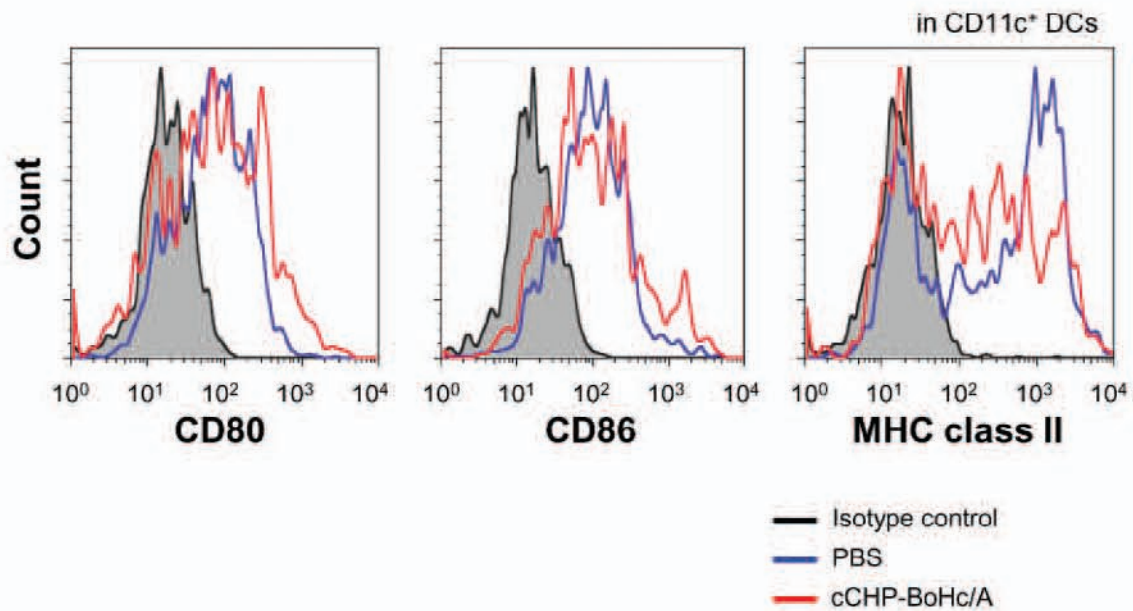

**Supplementary Fig. 9. Expression levels of co-stimulatory and antigen-presentation molecules by CD11c<sup>+</sup> nasal DCs are not enhanced by intranasal administration with cCHP-BoHc/A.** Nasal DCs spontaneously expressed CD80, CD86 and MHC class II, and their expression levels were not changed 1 day after intranasal administration with cCHP-BoHc/A.

Supplementary Table 1

T. Nochi, et al.

| Sample       | Endotoxin levels          |
|--------------|---------------------------|
| BoHc/A       | < 50mEU / $\mu$ g protein |
| CHP nanogel  | Not detected              |
| cCHP nanogel | Not detected              |

**Supplementary Table 1.** The amount of endotoxin contained in 10  $\mu$ g, 1  $\mu$ g, 100 ng, 10 ng and 1 ng of BoHc/A, CHP or cCHP nanogel were measured by Limulus J Single Test (Wako, Osaka, Japan). Detection sensitivity was  $\geq 50$  mEU / sample.

Supplementary Table 2

T. Nochi, et al.

| Sample      | Zeta-potential (mV) |
|-------------|---------------------|
| CHP         | $-1.0 \pm 2.0$      |
| CHP-BoHc/A  | $-1.4 \pm 1.1$      |
| cCHP        | $+5.4 \pm 1.5$      |
| cCHP-BoHc/A | $+7.0 \pm 0.5$      |

**Supplementary Table 2.** The zeta-potentials of CHP, CHP-BoHc/A, cCHP, cCHP-BoHc/A were measured by Zetasizer Nano ZS instrument (Malvern Instruments, Malvern, UK).

## Supplementary Table 3

T. Nochi, et al.

| Exp. No | Antigen (Dose) | Delivery vehicle (Amount) | Experimental design                                                                                                                                                                                                                                                                                                                                                                     | Figure     |
|---------|----------------|---------------------------|-----------------------------------------------------------------------------------------------------------------------------------------------------------------------------------------------------------------------------------------------------------------------------------------------------------------------------------------------------------------------------------------|------------|
| 1       | BoHc/A (10 µg) | CHP nanogel (88.9 µg)     | <p>Immunization ↑ 0 1 2 3 weeks</p> <p>Sampling ↓</p> <p>ELISA (BoNT/A-specific serum IgG) [red arrow]</p> <p>ELISA (BoNT/A-specific nasal wash IgA) [blue arrow]</p>                                                                                                                                                                                                                   | Fig. S3a,b |
|         | BoHc/A (10 µg) | None                      |                                                                                                                                                                                                                                                                                                                                                                                         |            |
|         | None           | None                      |                                                                                                                                                                                                                                                                                                                                                                                         |            |
| 2       | BoHc/A (10 µg) | cCHP nanogel (88.9 µg)    | <p>Immunization ↑ 0 1 2 3 4 weeks</p> <p>Sampling ↓</p> <p>ELISA (BoNT/A-specific serum IgG) [red arrow]</p> <p>ELISA (BoNT/A-specific nasal wash IgA) [blue arrow]</p> <p>Immunohistochemistry (IgA-producing cells in nasal tissue) [blue arrow]</p> <p>ELISPOT (BoNT/A-specific IgA-producing cells in nasal tissue) [blue arrow]</p> <p>Toxin-neutralizing study [yellow arrow]</p> | Fig. 2     |
|         | BoHc/A (10 µg) | None                      |                                                                                                                                                                                                                                                                                                                                                                                         |            |
|         | None           | None                      |                                                                                                                                                                                                                                                                                                                                                                                         |            |
| 3       | TT (30 µg)     | cCHP nanogel (78.5 µg)    | <p>Immunization ↑ 0 1 2 3 weeks</p> <p>Sampling ↓</p> <p>ELISA (TT-specific serum IgG) [red arrow]</p> <p>ELISA (TT-specific nasal wash IgA) [blue arrow]</p>                                                                                                                                                                                                                           | Fig. S6    |
|         | TT (30 µg)     | None                      |                                                                                                                                                                                                                                                                                                                                                                                         |            |
|         | None           | None                      |                                                                                                                                                                                                                                                                                                                                                                                         |            |

Supplementary Table 3. Three immunization experiments were performed in this study.
